# Supplementary material
Source: PubMed Central journal article supplement (PMC6885490)
Supplement: 10815_2019_1582_MOESM1_ESM.pdf [file 10815_2019_1582_MOESM1_ESM.pdf]

Supplementary Data

***SATB2* and *NGR1*: potential upstream regulatory factors in uterine leiomyomas**

Journal of Assisted Reproduction and Genetics

Shun Sato, Ryo Maekawa, Isao Tamura, Yuichiro Shirafuta, Masahiro Shinagawa, Hiromi Asada,

Toshiaki Taketani, Hiroshi Tamura and Norihiro Sugino

Department of Obstetrics and Gynecology, Yamaguchi University Graduate School of Medicine,

Minamikogushi 1-1-1, Ube, 755-8505 Japan

Corresponding author: Norihiro Sugino, M.D., Ph.D.

E-mail: [sugino@yamaguchi-u.ac.jp](mailto:sugino@yamaguchi-u.ac.jp)

Supplementary Table 1 Canonical pathways for the aberrantly expressed genes in uterine leiomyomas and the altered genes in the SATB2 and NRG1 lines

| #  | Uterine leiomyomas (151)                            | SATB2 line (92)                                                                | NRG1 line (58)                                                                 |
|----|-----------------------------------------------------|--------------------------------------------------------------------------------|--------------------------------------------------------------------------------|
| 1  | Hepatic Fibrosis / Hepatic Stellate Cell Activation | Axonal Guidance Signaling                                                      | Human Embryonic Stem Cell Pluripotency                                         |
| 2  | Macropinocytosis Signaling                          | Hepatic Fibrosis / Hepatic Stellate Cell Activation                            | Role of Osteoblasts, Osteoclasts and Chondrocytes in Rheumatoid Arthritis      |
| 3  | Atherosclerosis Signaling                           | Role of Osteoblasts, Osteoclasts and Chondrocytes in Rheumatoid Arthritis      | Hepatic Fibrosis / Hepatic Stellate Cell Activation                            |
| 4  | RAR Activation                                      | Osteoarthritis Pathway                                                         | G-Protein Coupled Receptor Signaling                                           |
| 5  | Complement System                                   | Leukocyte Extravasation Signaling                                              | Regulation of the Epithelial-Mesenchymal Transition Pathway                    |
| 6  | Clathrin-mediated Endocytosis Signaling             | Role of Macrophages, Fibroblasts and Endothelial Cells in Rheumatoid Arthritis | Adipogenesis pathway                                                           |
| 7  | IL-12 Signaling and Production in Macrophages       | Pancreatic Adenocarcinoma Signaling                                            | Factors Promoting Cardiogenesis in Vertebrates                                 |
| 8  | Leukocyte Extravasation Signaling                   | Human Embryonic Stem Cell Pluripotency                                         | Role of Macrophages, Fibroblasts and Endothelial Cells in Rheumatoid Arthritis |
| 9  | Protein Kinase A Signaling                          | Granulocyte Adhesion and Diapedesis                                            | Th1 and Th2 Activation Pathway                                                 |
| 10 | Endothelin-1 Signaling                              | Molecular Mechanisms of Cancer                                                 | G $\alpha$ i Signaling                                                         |
| 11 | Axonal Guidance Signaling                           | Atherosclerosis Signaling                                                      | Wnt/ $\beta$ -catenin Signaling                                                |
| 12 | HGF Signaling                                       | Virus Entry via Endocytic Pathways                                             | Mouse Embryonic Stem Cell Pluripotency                                         |

|    |                                                                                |                                                             |                                            |
|----|--------------------------------------------------------------------------------|-------------------------------------------------------------|--------------------------------------------|
| 13 | Colorectal Cancer Metastasis Signaling                                         | Factors Promoting Cardiogenesis in Vertebrates              | Retinoic acid Mediated Apoptosis Signaling |
| 14 | Tec Kinase Signaling                                                           | Reelin Signaling in Neurons                                 | TGF- $\beta$ Signaling                     |
| 15 | IL-8 Signaling                                                                 | Complement System                                           | Osteoarthritis Pathway                     |
| 16 | HER-2 Signaling in Breast Cancer                                               | Glioma Signaling                                            | Axonal Guidance Signaling                  |
| 17 | Role of Tissue Factor in Cancer                                                | Signaling by Rho Family GTPases                             | HGF Signaling                              |
| 18 | Granulocyte Adhesion and Diapedesis                                            | PTEN Signaling                                              | Amyotrophic Lateral Sclerosis Signaling    |
| 19 | Role of Macrophages, Fibroblasts and Endothelial Cells in Rheumatoid Arthritis | Aryl Hydrocarbon Receptor Signaling                         | Pancreatic Adenocarcinoma Signaling        |
| 20 | Renin-Angiotensin Signaling                                                    | Colorectal Cancer Metastasis Signaling                      | Ovarian Cancer Signaling                   |
| 21 | UVA-Induced MAPK Signaling                                                     | Wnt/ $\beta$ -catenin Signaling                             | Th2 Pathway                                |
| 22 | CXCR4 Signaling                                                                | PAK Signaling                                               | CD40 Signaling                             |
| 23 | Inhibition of Matrix Metalloproteases                                          | Macropinocytosis Signaling                                  | RANK Signaling in Osteoclasts              |
| 24 | GNRH Signaling                                                                 | Endothelin-1 Signaling                                      | NF- $\kappa$ B Signaling                   |
| 25 | Agranulocyte Adhesion and Diapedesis                                           | NF- $\kappa$ B Activation by Viruses                        | Triacylglycerol Biosynthesis               |
| 26 | Prolactin Signaling                                                            | Regulation of the Epithelial-Mesenchymal Transition Pathway | UVA-Induced MAPK Signaling                 |
| 27 | NRF2-mediated Oxidative Stress Response                                        | Glioblastoma Multiforme Signaling                           | HMGB1 Signaling                            |
| 28 | Bladder Cancer Signaling                                                       | Phospholipase C Signaling                                   | Leukocyte Extravasation Signaling          |
| 29 | EIF2 Signaling                                                                 | Agranulocyte Adhesion and Diapedesis                        | Th1 Pathway                                |
| 30 | Intrinsic Prothrombin Activation Pathway                                       | G $\alpha$ q Signaling                                      | p53 Signaling                              |

|    |                                                                              |                                                                              |                                           |
|----|------------------------------------------------------------------------------|------------------------------------------------------------------------------|-------------------------------------------|
| 31 | Acute Phase Response Signaling                                               | Neuropathic Pain Signaling In Dorsal Horn Neurons                            | NRF2-mediated Oxidative Stress Response   |
| 32 | Aryl Hydrocarbon Receptor Signaling                                          | Ovarian Cancer Signaling                                                     | Small Cell Lung Cancer Signaling          |
| 33 | Death Receptor Signaling                                                     | HIF1 $\alpha$ Signaling                                                      | RAR Activation                            |
| 34 | HMGB1 Signaling                                                              | Caveolar-mediated Endocytosis Signaling                                      | cAMP-mediated signaling                   |
| 35 | HIF1 $\alpha$ Signaling                                                      | Phagosome Formation                                                          | Xenobiotic Metabolism Signaling           |
| 36 | Agrin Interactions at Neuromuscular Junction                                 | Role of Tissue Factor in Cancer                                              | Molecular Mechanisms of Cancer            |
| 37 | Role of Pattern Recognition Receptors in Recognition of Bacteria and Viruses | FAK Signaling                                                                | Superoxide Radicals Degradation           |
| 38 | Molecular Mechanisms of Cancer                                               | VDR/RXR Activation                                                           | FGF Signaling                             |
| 39 | LPS/IL-1 Mediated Inhibition of RXR Function                                 | G $\alpha$ 12/13 Signaling                                                   | Acute Myeloid Leukemia Signaling          |
| 40 | ErbB Signaling                                                               | Mouse Embryonic Stem Cell Pluripotency                                       | Chondroitin Sulfate Biosynthesis          |
| 41 | Growth Hormone Signaling                                                     | HMGB1 Signaling                                                              | MSP-RON Signaling Pathway                 |
| 42 | PPAR $\alpha$ /RXR $\alpha$ Activation                                       | Adipogenesis pathway                                                         | $\gamma$ -glutamyl Cycle                  |
| 43 | Chemokine Signaling                                                          | Protein Kinase A Signaling                                                   | Dermatan Sulfate Biosynthesis             |
| 44 | Production of Nitric Oxide and Reactive Oxygen Species in Macrophages        | NRF2-mediated Oxidative Stress Response                                      | Cardiac Hypertrophy Signaling             |
| 45 | Glucocorticoid Receptor Signaling                                            | Role of Pattern Recognition Receptors in Recognition of Bacteria and Viruses | Hematopoiesis from Multipotent Stem Cells |
| 46 | P2Y Purigenic Receptor Signaling Pathway                                     | LPS/IL-1 Mediated Inhibition of RXR Function                                 | STAT3 Pathway                             |
| 47 | Reelin Signaling in Neurons                                                  | Growth Hormone Signaling                                                     | Sphingosine-1-phosphate Signaling         |

|    |                                                      |                                                             |                                                                              |
|----|------------------------------------------------------|-------------------------------------------------------------|------------------------------------------------------------------------------|
|    | GPCR-Mediated Nutrient                               |                                                             |                                                                              |
| 48 | Sensing in Enteroendocrine Cells                     | Paxillin Signaling                                          | BMP signaling pathway                                                        |
| 49 | Cancer Drug Resistance By Drug Efflux                | Bladder Cancer Signaling                                    | CD27 Signaling in Lymphocytes                                                |
| 50 | NF- $\kappa$ B Signaling                             | Inflammasome pathway                                        | Serotonin Receptor Signaling                                                 |
| 51 | Phagosome Formation                                  | Xenobiotic Metabolism Signaling                             | G $\alpha$ 12/13 Signaling                                                   |
| 52 | Cardiac Hypertrophy Signaling                        | ILK Signaling                                               | Unfolded protein response                                                    |
| 53 | Coagulation System                                   | Role of NFAT in Cardiac Hypertrophy                         | LPS/IL-1 Mediated Inhibition of RXR Function                                 |
| 54 | Putrescine Degradation III                           | IL-8 Signaling                                              | Role of Pattern Recognition Receptors in Recognition of Bacteria and Viruses |
| 55 | Tryptophan Degradation X (Mammalian, via Tryptamine) | Clathrin-mediated Endocytosis Signaling                     | Chondroitin Sulfate Biosynthesis (Late Stages)                               |
| 56 | MIF Regulation of Innate Immunity                    | Myo-inositol Biosynthesis                                   | G $\alpha$ q Signaling                                                       |
| 57 | Fatty Acid $\alpha$ -oxidation                       | Tec Kinase Signaling                                        | Prostanoid Biosynthesis                                                      |
| 58 | p53 Signaling                                        | HGF Signaling                                               | Coagulation System                                                           |
| 59 | Role of NFAT in Cardiac Hypertrophy                  | Neuregulin Signaling                                        |                                                                              |
| 60 | G Beta Gamma Signaling                               | Role of NANOG in Mammalian Embryonic Stem Cell Pluripotency |                                                                              |
| 61 | G-Protein Coupled Receptor Signaling                 | RhoGDI Signaling                                            |                                                                              |
| 62 | LXR/RXR Activation                                   | Superoxide Radicals Degradation                             |                                                                              |
| 63 | LPS-stimulated MAPK Signaling                        | Agrin Interactions at Neuromuscular Junction                |                                                                              |
| 64 | Sphingosine-1-phosphate Signaling                    | PDGF Signaling                                              |                                                                              |

|    |                                                             |                                                      |
|----|-------------------------------------------------------------|------------------------------------------------------|
| 65 | Regulation of the Epithelial-Mesenchymal Transition Pathway | Glioma Invasiveness Signaling                        |
| 66 | CCR5 Signaling in Macrophages                               | NF- $\kappa$ B Signaling                             |
| 67 | Hepatic Cholestasis                                         | eNOS Signaling                                       |
| 68 | STAT3 Pathway                                               | Nitric Oxide Signaling in the Cardiovascular System  |
| 69 | Role of NFAT in Regulation of the Immune Response           | Basal Cell Carcinoma Signaling                       |
| 70 | Dendritic Cell Maturation                                   | MSP-RON Signaling Pathway                            |
| 71 | Xenobiotic Metabolism Signaling                             | Sphingosine-1-phosphate Signaling                    |
| 72 | Extrinsic Prothrombin Activation Pathway                    | PI3K/AKT Signaling                                   |
| 73 | Thrombin Signaling                                          | Integrin Signaling                                   |
| 74 | Inhibition of Angiogenesis by TSP1                          | Cyclins and Cell Cycle Regulation                    |
| 75 | Human Embryonic Stem Cell Pluripotency                      | CD40 Signaling                                       |
| 76 | 14-3-3-mediated Signaling                                   | UVA-Induced MAPK Signaling                           |
| 77 | Corticotropin Releasing Hormone Signaling                   | IGF-1 Signaling                                      |
| 78 | UVB-Induced MAPK Signaling                                  | Glucocorticoid Receptor Signaling                    |
| 79 | IGF-1 Signaling                                             | Estrogen-Dependent Breast Cancer Signaling           |
| 80 | Osteoarthritis Pathway                                      | VEGF Signaling                                       |
| 81 | Sertoli Cell-Sertoli Cell Junction Signaling                | Regulation of Cellular Mechanics by Calpain Protease |
| 82 | IL-1 Signaling                                              | Triacylglycerol Biosynthesis                         |
| 83 | Synaptic Long Term Depression                               | Prostanoid Biosynthesis                              |

|     |                                                |                                              |
|-----|------------------------------------------------|----------------------------------------------|
| 84  | Glutathione Redox Reactions<br>I               | Coagulation System                           |
| 85  | UVC-Induced MAPK<br>Signaling                  | Ethanol Degradation IV                       |
| 86  | Thrombopoietin Signaling                       | TGF- $\beta$ Signaling                       |
| 87  | $\alpha$ -Adrenergic Signaling                 | Germ Cell-Sertoli Cell<br>Junction Signaling |
| 88  | Erythropoietin Signaling                       | Breast Cancer Regulation by<br>Stathmin1     |
| 89  | Paxillin Signaling                             | Ephrin Receptor Signaling                    |
| 90  | IL-6 Signaling                                 | Parkinson's Signaling                        |
| 91  | Fc $\gamma$ RIIB Signaling in B<br>Lymphocytes | HER-2 Signaling in Breast<br>Cancer          |
| 92  | Noradrenaline and<br>Adrenaline Degradation    | Wnt/Ca <sup>+</sup> pathway                  |
| 93  | Renal Cell Carcinoma<br>Signaling              |                                              |
| 94  | Germ Cell-Sertoli Cell<br>Junction Signaling   |                                              |
| 95  | cAMP-mediated signaling                        |                                              |
| 96  | Aldosterone Signaling in<br>Epithelial Cells   |                                              |
| 97  | MSP-RON Signaling<br>Pathway                   |                                              |
| 98  | TGF- $\beta$ Signaling                         |                                              |
| 99  | Relaxin Signaling                              |                                              |
| 100 | Oncostatin M Signaling                         |                                              |
| 101 | ErbB4 Signaling                                |                                              |
| 102 | eNOS Signaling                                 |                                              |
| 103 | Type II Diabetes Mellitus<br>Signaling         |                                              |
| 104 | p38 MAPK Signaling                             |                                              |
| 105 | G Protein Signaling Mediated<br>by Tubby       |                                              |
| 106 | Tight Junction Signaling                       |                                              |

- 107 Pyridoxal 5'-phosphate  
Salvage Pathway
- 108 Apoptosis Signaling
- 109 Glioma Signaling
- 110 iNOS Signaling
- 111 Ethanol Degradation IV
- 112 Cholecystinin/Gastrin-  
mediated Signaling
- 113 p70S6K Signaling
- 114 Dopamine Degradation
- 115 MIF-mediated  
Glucocorticoid Regulation  
Role of JAK family kinases
- 116 in IL-6-type Cytokine  
Signaling
- 117 Virus Entry via Endocytic  
Pathways
- 118 Melatonin Signaling
- 119 Role of Osteoblasts,  
Osteoclasts and  
Chondrocytes in Rheumatoid  
Arthritis
- 120 VEGF Family Ligand-  
Receptor Interactions
- 121 Wnt/ $\beta$ -catenin Signaling
- 122 VEGF Signaling
- 123 mTOR Signaling
- 124 Prostanoid Biosynthesis
- 125 PCP pathway
- 126 Retinoic acid Mediated  
Apoptosis Signaling
- 127 Fc Epsilon RI Signaling
- 128 Nitric Oxide Signaling in the  
Cardiovascular System
- 129 PPAR Signaling
- 130 ERK5 Signaling



|     |                                                                                       |
|-----|---------------------------------------------------------------------------------------|
| 131 | GPCR-Mediated Integration<br>of Enteroendocrine Signaling<br>Exemplified by an L Cell |
| 132 | Neurotrophin/TRK Signaling                                                            |
| 133 | PDGF Signaling                                                                        |
| 134 | CREB Signaling in Neurons                                                             |
| 135 | Salvage Pathways of<br>Pyrimidine Ribonucleotides<br>Regulation of IL-2               |
| 136 | Expression in Activated and<br>Anergic T Lymphocytes                                  |
| 137 | B Cell Receptor Signaling                                                             |
| 138 | Ovarian Cancer Signaling                                                              |
| 139 | JAK/Stat Signaling                                                                    |
| 140 | Glioblastoma Multiforme<br>Signaling                                                  |
| 141 | Gap Junction Signaling                                                                |
| 142 | Glioma Invasiveness<br>Signaling                                                      |
| 143 | Sumoylation Pathway                                                                   |
| 144 | Adipogenesis pathway                                                                  |
| 145 | PI3K Signaling in B<br>Lymphocytes                                                    |
| 146 | PAK Signaling                                                                         |
| 147 | Neuropathic Pain Signaling<br>In Dorsal Horn Neurons                                  |
| 148 | Caveolar-mediated<br>Endocytosis Signaling                                            |
| 149 | Nicotine Degradation II                                                               |
| 150 | Chronic Myeloid Leukemia<br>Signaling                                                 |
| 151 | Pancreatic Adenocarcinoma<br>Signaling                                                |

Canonical pathways were analyzed with Ingenuity Pathway Analysis (IPA) software.

Pathways with p-values below 0.05 were selected.

The numbers of pathways are shown in parentheses.

Supplementary Table 2 PCR primers used in this study

| #  | Gene name    | Usage                      | Amplified region (UCSC hg19)   | PCR primers                                                         | Product size (bp) | # of CpGs | Restriction enzyme<br>Fragment size (bp) |
|----|--------------|----------------------------|--------------------------------|---------------------------------------------------------------------|-------------------|-----------|------------------------------------------|
| 1  | <i>SATB2</i> | COBRA                      | chr2: 200,330,754-200,331,048  | F: TTAGAAAAGTGGTGGGTTTTTTTTAGTT<br>R: TACACCCACAACCTCAAATTCTACTATCC | 295               | 9         | <i>Hpy</i> CH4IV<br>148 / 147            |
| 2  | <i>NRG1</i>  | COBRA                      | chr8: 32,503,979-32,504,264    | F: TGTTGTTGAAAAGTTTATTTTTTTAGGGAG<br>R: ACATCAATTAACCTAATCCCCATAACC | 286               | 3         | <i>Taq</i> I<br>132 / 154                |
| 3  | <i>SATB2</i> | RT-PCR<br>real-time RT-PCR | chr2: 200,193,607-200,213,649  | F: GATAAACCAACAGATTGCCGTTAG<br>R: CTTACGCAGAATCTCAGACAACAAT         | 253               | -         | -                                        |
| 4  | <i>NRG1</i>  | RT-PCR<br>real-time RT-PCR | chr8: 32,453,412-32,463,168    | F: GTGTGAAACCAGTTCTGAATACTCC<br>R: CACTGTCATTTCTAATTTGCTGAT         | 200               | -         | -                                        |
| 5  | <i>ESR1</i>  | real-time RT-PCR           | chr6: 152,163,839-152,201,854  | F: TGTGCAATGACTATGCTTCA<br>R: GCTCTTCCTCCTGTTTTTA                   | 149               | -         | -                                        |
| 6  | <i>PGR</i>   | real-time RT-PCR           | chr11: 100,909,902-100,912,802 | F: GTTTGAGGAGATGAGGTCAAGC<br>R: TGTGCAGCAATAACTTCAGACA              | 228               | -         | -                                        |
| 7  | <i>GAPDH</i> | RT-PCR                     | chr12: 6,646,484-6,647,017     | F: GTGGATAGAACACTGACTCTTGC<br>R: GAGCCTAAGGAGACATGACTACT            | 341               | -         | -                                        |
| 8  | <i>GAPDH</i> | real-time RT-PCR           | chr12: 6,644,006-6,645,736     | F: AGGTGAAGGTCGGAGTCA<br>R: GGTCATTGATGGCAACAA                      | 99                | -         | -                                        |
| 9  | <i>SATB2</i> | CDS amplification          | chr2: 200,136,890-200,320,790  | F: CTCGAGTGGGAACCTTGTCTCCGAGT<br>R: GTCGACAAATCCTTGGACCGATGTATTG    | 2276              | -         | -                                        |
| 10 | <i>NRG1</i>  | CDS amplification          | chr8: 32,406,148-32,621,948    | F: CTCGAGACGTAGAGCGCTCCGTCTC<br>R: CCCGGGCAGGTGAATCTATGTGTTTATTAGG  | 1988              | -         | -                                        |
